# Supplementary material
Source: HighWire-hosted journal article supplement (https://erj.ersjournals.com/content/58/2/2004078)
Supplement: inline-supplementary-material-1 [file inline-supplementary-material-1.pdf]

**Supplementary table. Costs to be considered in economic evaluation of new tuberculosis infection tests**

| Type of cost                                              | Additional questions and information                                                                                                                                                                                                                                                                                                                                                                |
|-----------------------------------------------------------|-----------------------------------------------------------------------------------------------------------------------------------------------------------------------------------------------------------------------------------------------------------------------------------------------------------------------------------------------------------------------------------------------------|
| <b>Start-up costs</b>                                     |                                                                                                                                                                                                                                                                                                                                                                                                     |
| Laboratory equipment                                      | <p>If equipment will be used exclusively for testing for TB infection, include total cost of equipment</p> <p>If equipment will not be used exclusively for testing for TB infection, specify approximate proportion of time that it will be dedicated to new test</p> <p>For each piece of equipment, specify how long it is expected to last in order to depreciate capital costs accordingly</p> |
| Laboratory space                                          | Is additional space required for the new test for TB infection?                                                                                                                                                                                                                                                                                                                                     |
| Initial calibration of equipment                          | Specify time requirements and job titles of people involved in task; or give cost of service contract                                                                                                                                                                                                                                                                                               |
| Licensing                                                 | Specify total cost for purchase of licence                                                                                                                                                                                                                                                                                                                                                          |
| Computers                                                 | <p>Specify total cost for purchase of all new computers required</p> <p>For each piece of equipment, specify how long it is expected to last in order to depreciate capital costs accordingly</p>                                                                                                                                                                                                   |
| Software                                                  | Specify total cost for purchase of all software required                                                                                                                                                                                                                                                                                                                                            |
| Additional equipment (fridge, air-conditioner, generator) | <p>Specify total cost for purchase of all new equipment</p> <p>For each piece of equipment, specify how long it is expected to last in order to depreciate capital costs accordingly</p>                                                                                                                                                                                                            |
| Initial training                                          | Specify total cost; or number, time requirements and job titles of people who would attend training                                                                                                                                                                                                                                                                                                 |
| <b>Recurring costs</b>                                    |                                                                                                                                                                                                                                                                                                                                                                                                     |
| Ongoing calibration                                       | Specify cost per session and frequency                                                                                                                                                                                                                                                                                                                                                              |
| Ongoing licensing                                         | Specify renewal cost and frequency                                                                                                                                                                                                                                                                                                                                                                  |
| Ongoing training                                          | Specify total cost; or number, time requirements and job titles of people who would attend training                                                                                                                                                                                                                                                                                                 |
| Equipment maintenance (per year)                          | Specify time requirements and job titles of people involved in task; or give cost of service contract                                                                                                                                                                                                                                                                                               |
| Quality assurance                                         | <p>Specify time requirements and job titles of people involved in task; or give cost of service contract</p> <p>Specify supplies required to conduct quality assurance</p>                                                                                                                                                                                                                          |

|                                                                             |                                                                                                                                                      |
|-----------------------------------------------------------------------------|------------------------------------------------------------------------------------------------------------------------------------------------------|
| Supplies required to administer test (e.g. gloves, syringes)                | Ideally specify per-sample cost; or ensure units are otherwise clearly specified                                                                     |
| Laboratory supplies for analysis                                            | Ideally specify per-sample cost; or ensure units are otherwise clearly specified                                                                     |
| Costs associated with cold chain                                            | If cold chain is required, specify required items and their costs and units                                                                          |
| Costs associated with shipping of samples                                   | If samples are shipped to a laboratory, specify shipping costs per sample; specify per-sample costs, or ensure units are otherwise clearly specified |
| <b>Personnel</b>                                                            |                                                                                                                                                      |
| Approximate amount of time required to take sample                          | Specify time in minutes                                                                                                                              |
| Category of personnel who can obtain sample                                 | Specify nurse or other personnel (provide details)                                                                                                   |
| Approximate amount of personnel time required to process and analyse sample | Specify time in minutes                                                                                                                              |
| Category of personnel who can process or analyse sample                     | Specify laboratory technician or other personnel (provide details)                                                                                   |
| Approximate amount of time to interpret result                              | Specify time in minutes                                                                                                                              |
| Category of personnel who can interpret result                              | Specify laboratory technician, medical doctor or clerical staff                                                                                      |

Note: For the reference standard, start-up costs should be estimated based on the current cost to repurchase equipment, licensing agreements, and so on.
